# Supplementary material for: Two enzymes with redundant fructose bisphosphatase activity sustain gluconeogenesis and virulence in Mycobacterium tuberculosis
Source: PubMed Central journal article supplement (PMC4535450; doi:10.1038/ncomms8912), 2015-08-10
Supplement: NIHMS703449-supplement-1.pdf [file NIHMS703449-supplement-1.pdf]

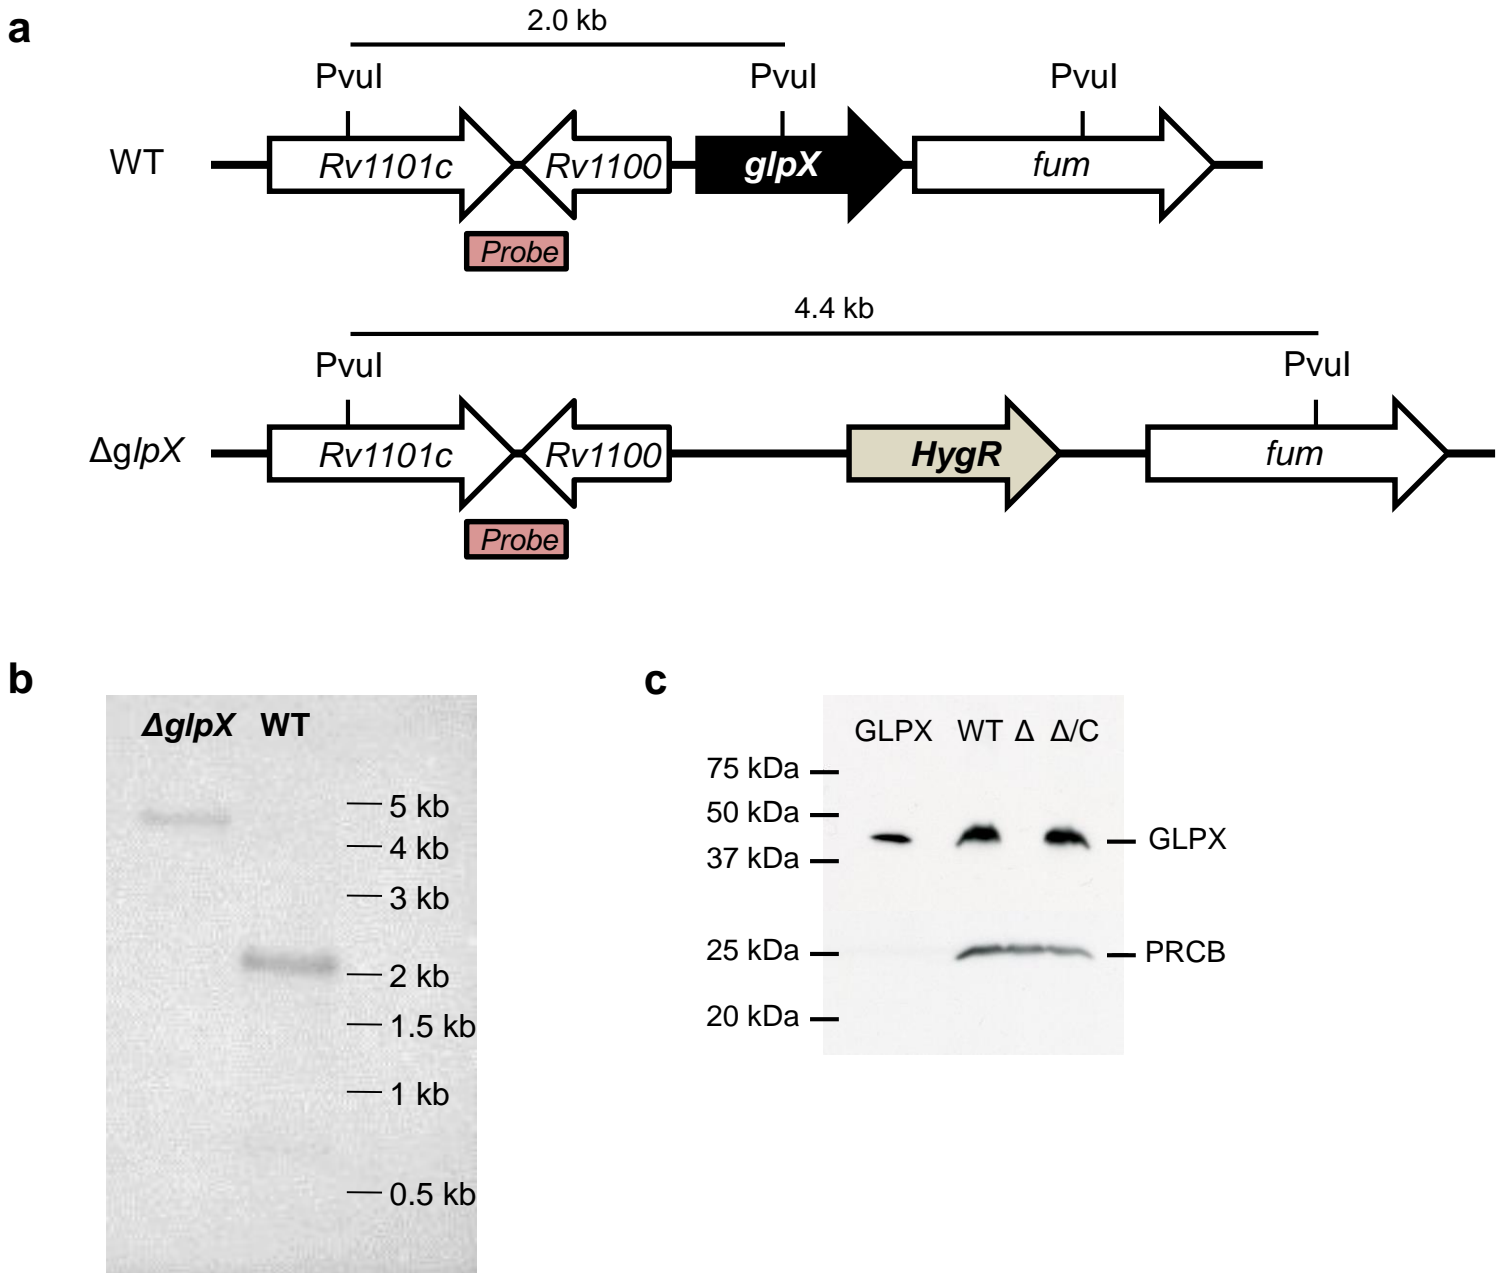

**Supplementary Fig. 1. Generation and Validation of  $\Delta glpX$ .** (a) Strategy for deleting *glpX* (*Rv1099c*) by homologous recombination and validating  $\Delta glpX$  candidates by *PvuI* digest and southern blot analysis. (b) Southern blot analysis of WT *Mtb* and  $\Delta glpX$  where genomic DNA was digested with *PvuI*. (c) Western blot analysis of WT *Mtb* (WT),  $\Delta glpX$  ( $\Delta$ ), and complemented strain  $\Delta glpX/C$  ( $\Delta/C$ ) cell lysates with anti-GLPX antibody. Molecular weight of GLPX is 38.09 kDa. Recombinant His-tagged GLPX (GLPX, 39.96 kDa) was run as a positive control. Anti-PRCB was used to confirm equal loading.

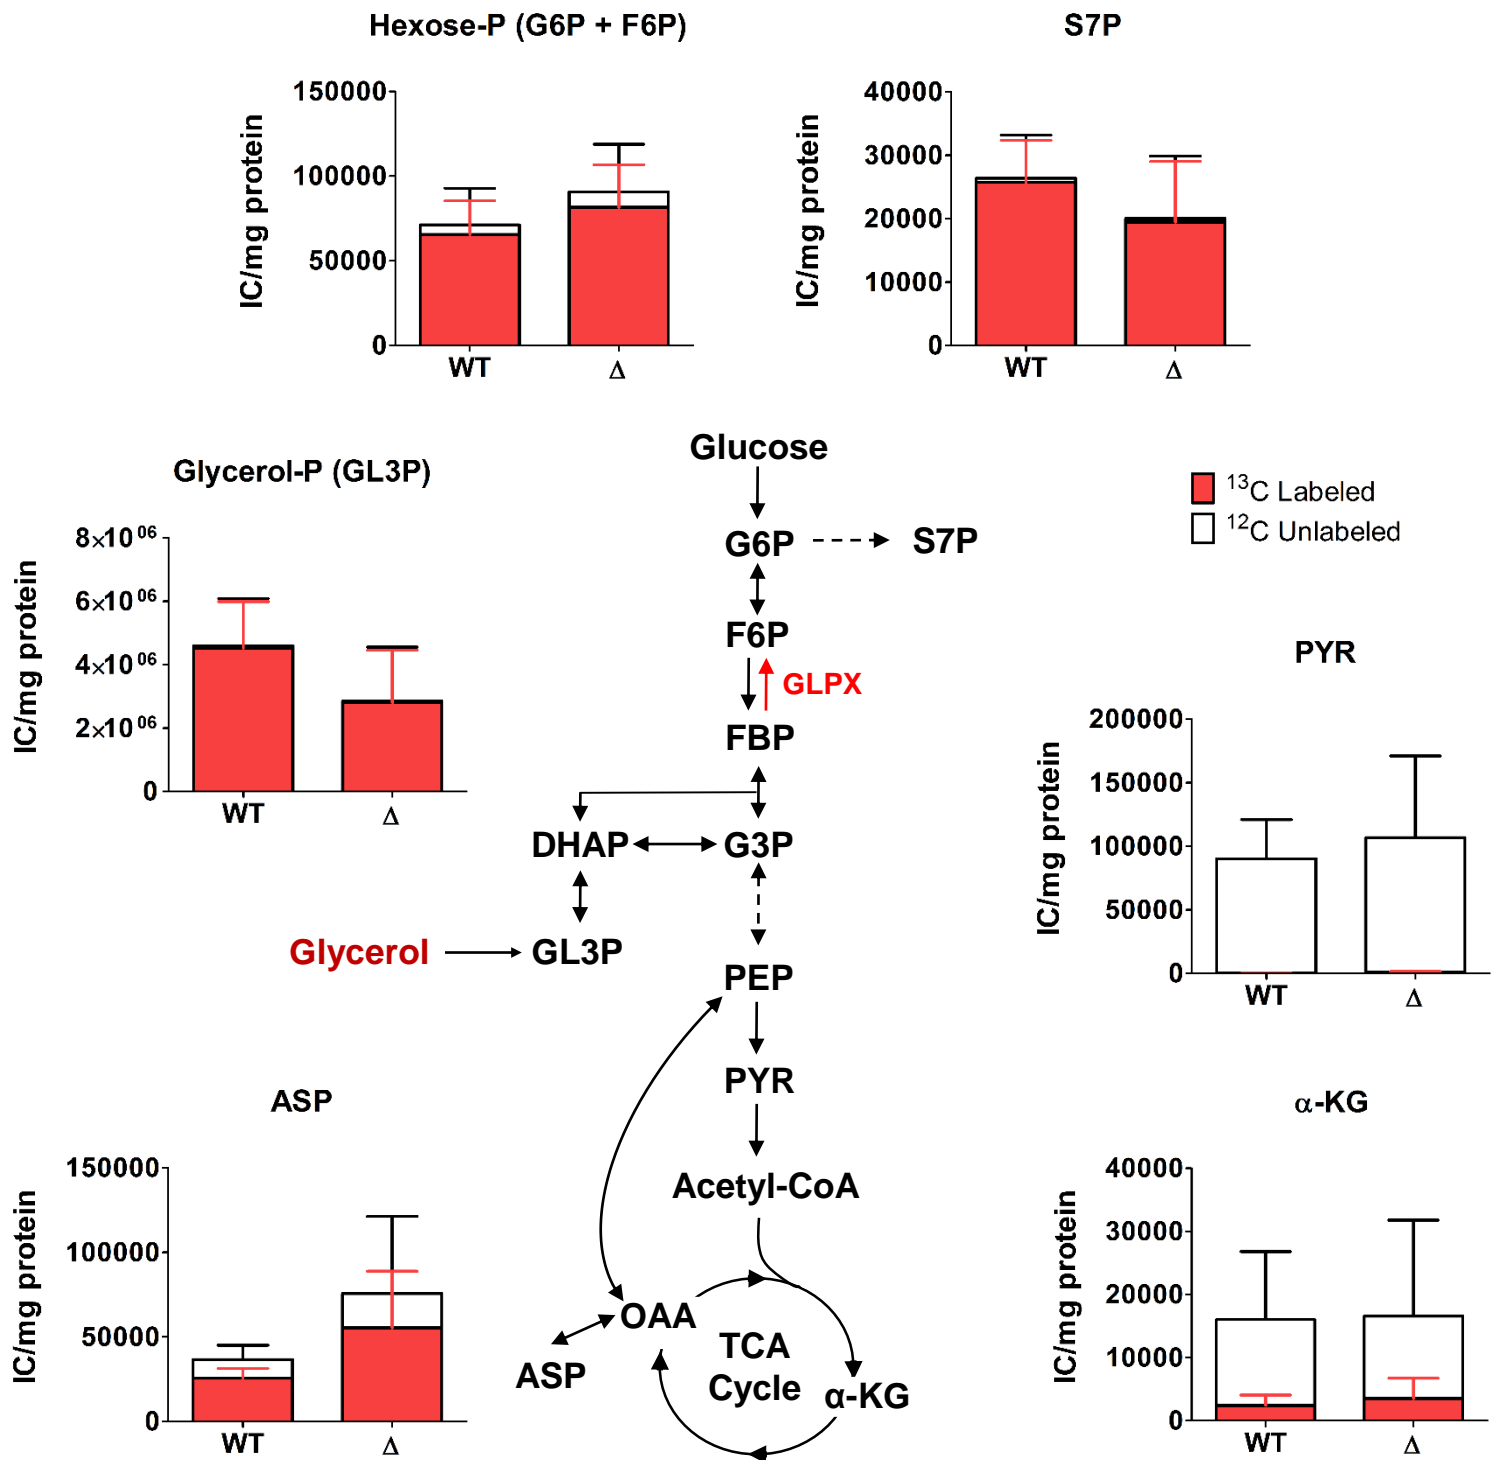

**Supplementary Fig. 2. Gluconeogenesis is not strictly dependent on GLPX.** Abundance and <sup>13</sup>C labeling of metabolites in WT *Mtb* and  $\Delta glpX$  ( $\Delta$ ). Bacteria were grown on glycerol-containing plates for 5 days and then transferred to U-<sup>13</sup>C glycerol-containing plates for an additional 16h prior to harvesting. Data are means  $\pm$  standard deviation of three biological replicates and are representative of two independent experiments. Data are reported as ion counts (IC) per mg total protein. \*0.01 < P  $\leq$  0.05, \*\*0.001 < P  $\leq$  0.01, \*\*\*P  $\leq$  0.001 by Student's t-test. G6P: glucose 6-phosphate, S7P: sedoheptulose 7-phosphate, F6P: fructose 6-phosphate, FBP: fructose 1,6-bisphosphate, DHAP: dihydroxyacetone phosphate, G3P: glyceraldehyde 3-phosphate, GL3P: glycerol 3-phosphate, PEP: phosphoenolpyruvate, PYR: pyruvate, OAA: oxaloacetate, ASP: aspartate  $\alpha$ -KG:  $\alpha$ -ketoglutarate.

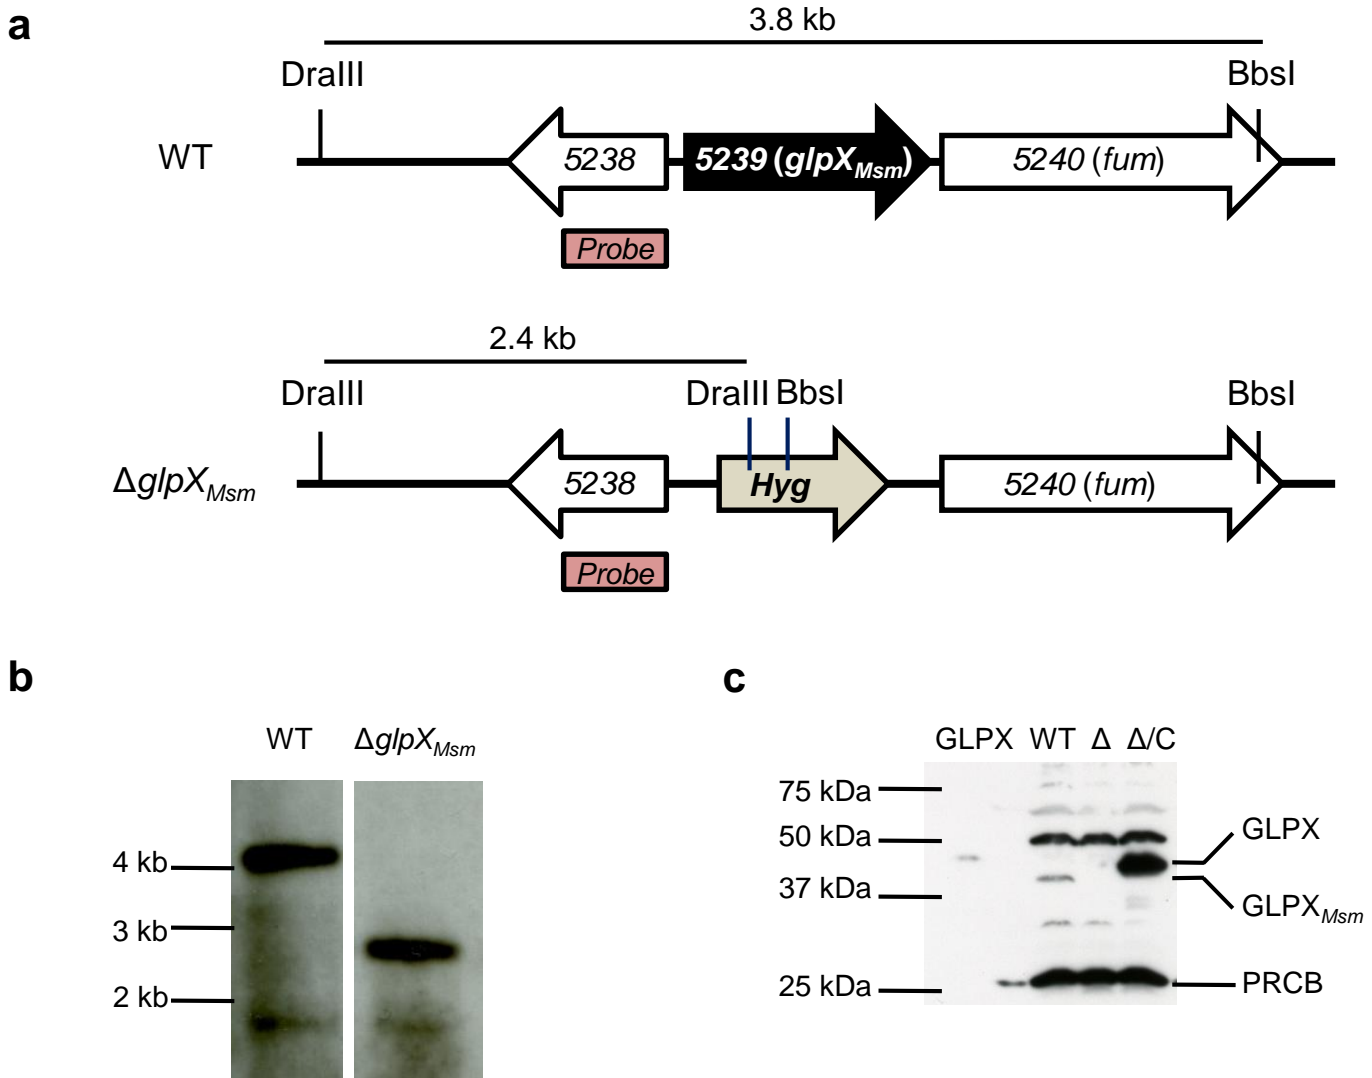

**Supplementary Fig. 3. Generation and Validation of  $\Delta glpX_{Msm}$ .** (a) Strategy for deleting *msmeg\_5239* (*glpX* homolog in *M. smegmatis*) by homologous recombination and validating  $\Delta glpX_{Msm}$  candidates by DraIII and BbsI double digest and southern blot analysis. (b) Southern blot analysis of WT *Msm* and  $\Delta glpX_{Msm}$  where genomic DNA was digested with DraIII and BbsI. (c) Western blot analysis of WT *Msm* (WT),  $\Delta glpX_{Msm}$  ( $\Delta$ ), and complemented strain  $\Delta glpX_{Msm}/C$  (*glpX*) ( $\Delta/C$ ) cell lysates with anti-GLPX antibody. Molecular weight of  $GLPX_{Msm}$  is 35.87 kDa. Molecular weight of GLPX is 38.09 kDa. Recombinant His-tagged GLPX (GLPX, 39.96 kDa) was run as a positive control. Anti-PRCB was used to confirm equal loading.

**a**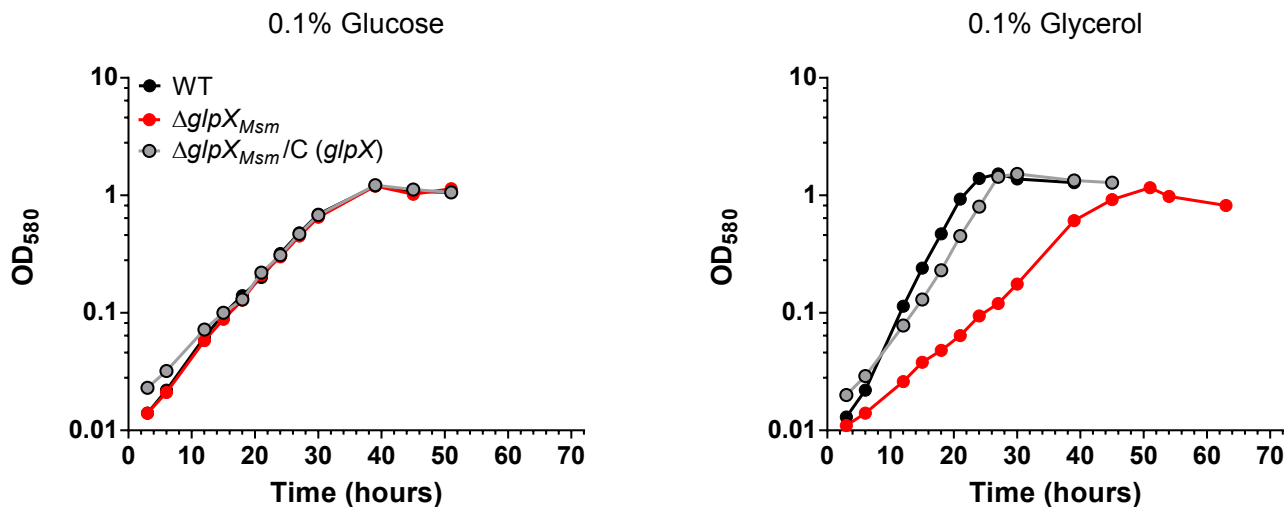**b**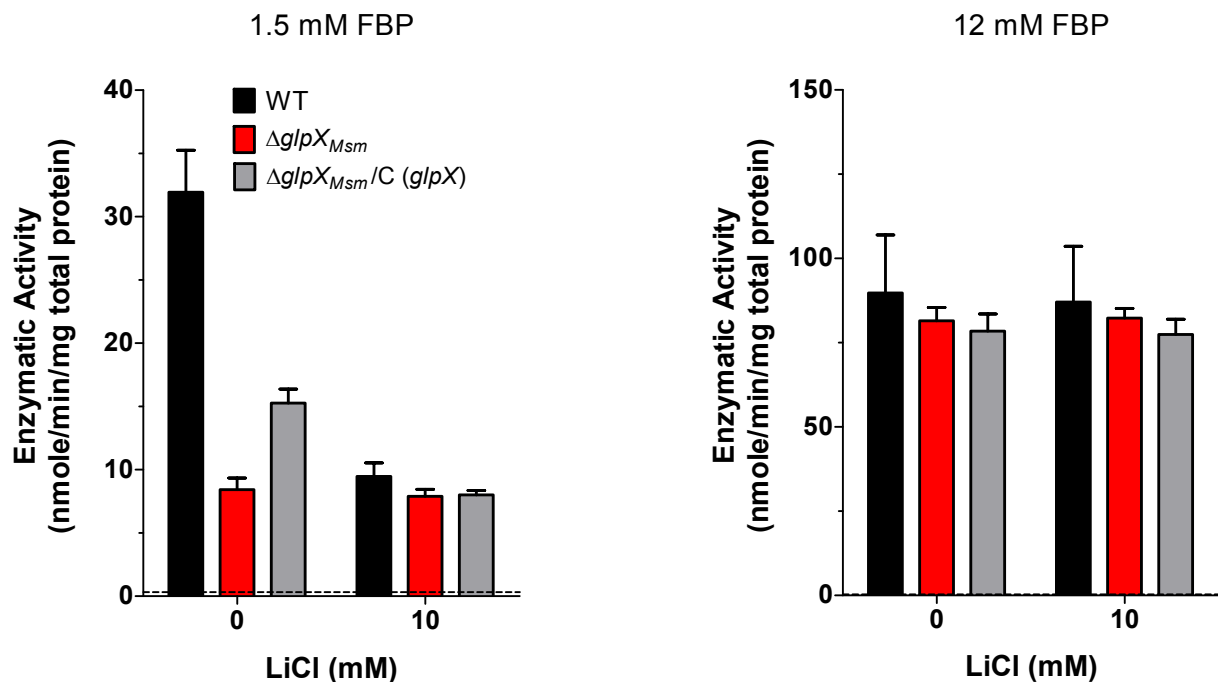

**Supplementary Fig. 4.  $\Delta glpX_{Msm}$  can grow on gluconeogenic carbon sources and has detectable FBPase activity.** (a) Growth of WT *Msm* (black),  $\Delta glpX_{Msm}$  (red) and complemented strain  $\Delta glpX_{Msm}/C$  (*glpX*) (gray) in 7H9 media containing 0.1% glucose or 0.1% glycerol as the sole carbon source. Data are representative of three independent experiments. (b) FBPase activity of WT *Msm* (black),  $\Delta glpX_{Msm}$  (red) and complemented strain  $\Delta glpX_{Msm}/C$  (*glpX*) (gray) cell lysates in the absence or presence of lithium chloride using 1.5 mM F-1,6BP or 12 mM F-1,6BP as substrate. Dashed line indicates limit of detection. Data are means  $\pm$  standard deviation of three biological replicates.

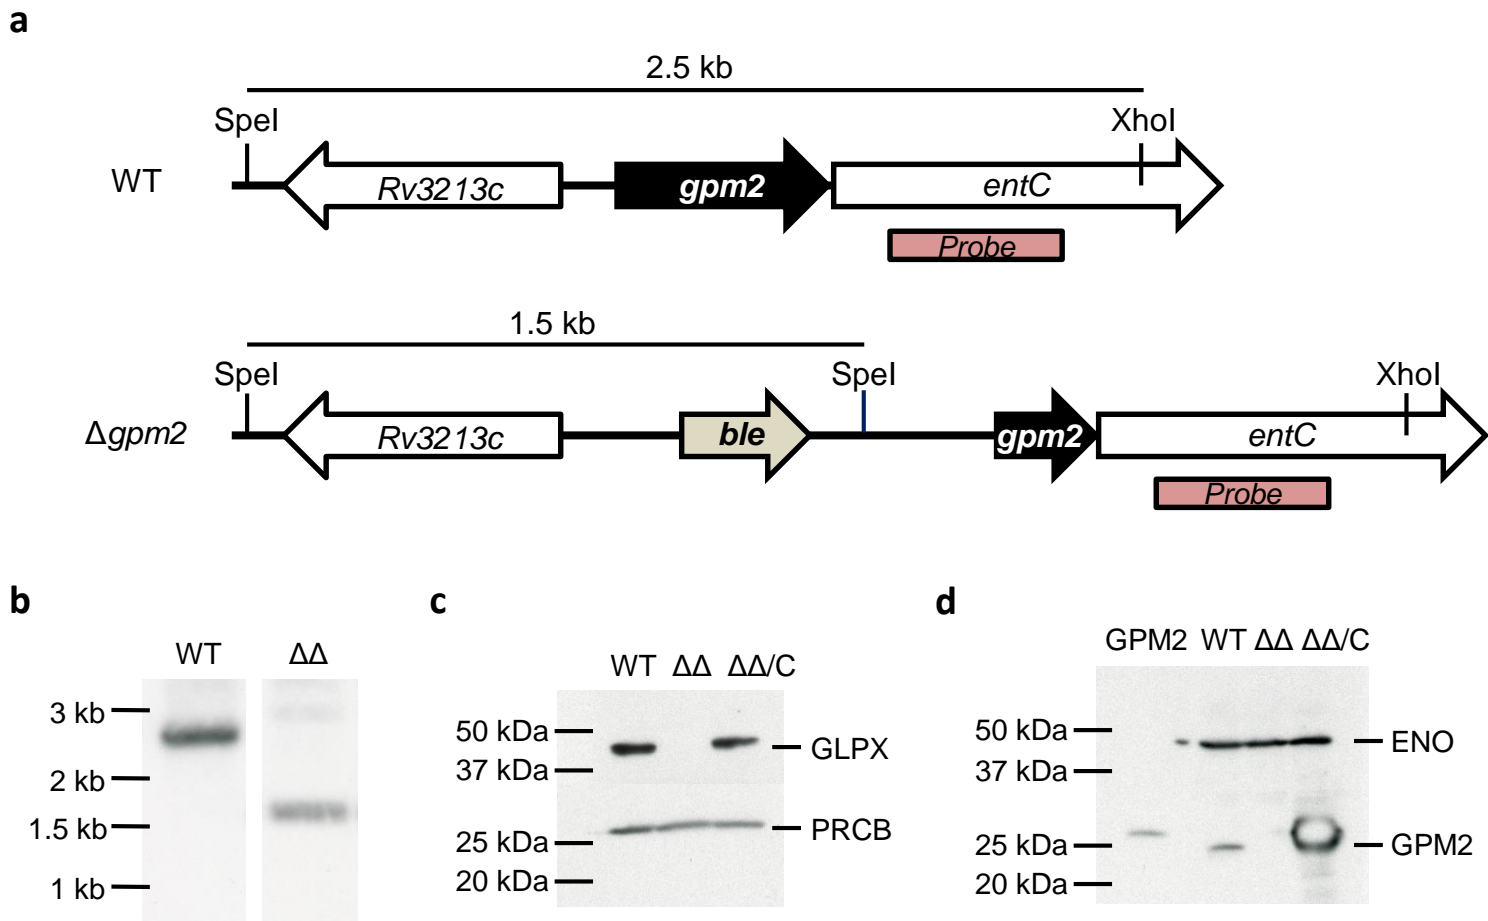

**Supplementary Fig. 5. Generation and Validation of *Mtb*  $\Delta$ glpX $\Delta$ gpm2.** (a) Strategy for deleting *gpm2* (*Rv3214*) by homologous recombination and validating  $\Delta$ glpX $\Delta$ gpm2 candidates by SpeI and XhoI double digest and southern blot analysis. (b) Southern blot analysis of WT *Mtb* and  $\Delta$ glpX $\Delta$ gpm2 where genomic DNA was digested with SpeI and XhoI. (c) Western blot analysis of WT *Mtb* (WT),  $\Delta$ glpX $\Delta$ gpm2 ( $\Delta\Delta$ ), and complemented strain  $\Delta$ glpX $\Delta$ gpm2/C (*glpX*) ( $\Delta\Delta$ /C) cell lysates with anti-GLPX antibody. Molecular weight of GLPX is 38.09 kDa. Anti-PRCB was used to confirm equal loading. (d) Western blot analysis of WT *Mtb* (WT),  $\Delta$ glpX $\Delta$ gpm2 ( $\Delta\Delta$ ), and complemented strain  $\Delta$ glpX $\Delta$ gpm2/C (*gpm2*) ( $\Delta\Delta$ /C) cell lysates with anti-GPM2 antibody. Molecular weight of GPM2 is 21.95 kDa. Recombinant His-tagged GPM2 (GPM2, 23.85 kDa) was run as a positive control. Anti-ENO was used to confirm equal loading.

**a**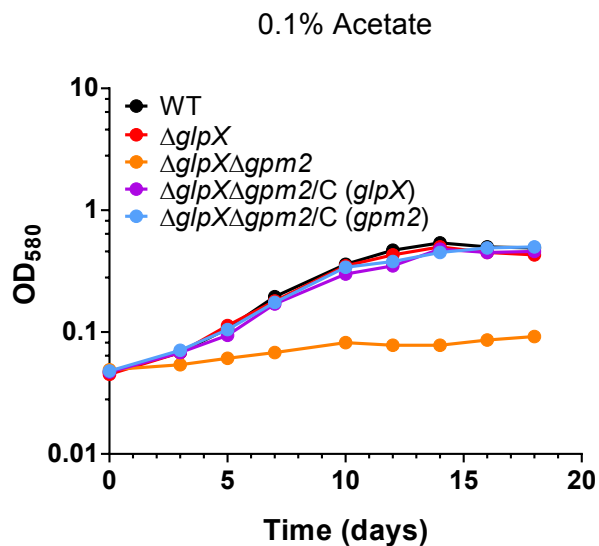**b**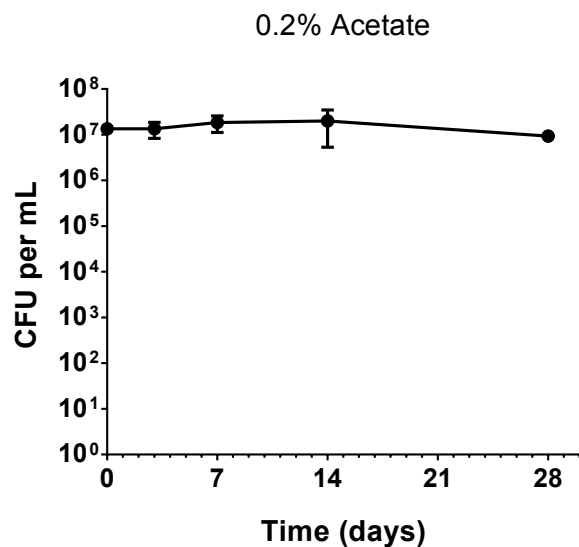

**Supplementary Fig. 6. *Mtb*  $\Delta glpX\Delta gpm2$  does not grow on fatty acids as a sole carbon source but remains viable. (a)** Growth of WT *Mtb* (black),  $\Delta glpX$  (red),  $\Delta glpX\Delta gpm2$  (orange) and complemented strains  $\Delta glpX\Delta gpm2/C (glpX)$  (purple) and  $\Delta glpX\Delta gpm2/C (gpm2)$  (blue) in Sauton's minimal media containing 0.1% acetate. Data are representative of three independent experiments. **(b)** Survival of  $\Delta glpX\Delta gpm2$  in Sauton's minimal media containing 0.2% acetate. Data represent the mean CFU/mL of three biological replicates at different time points.

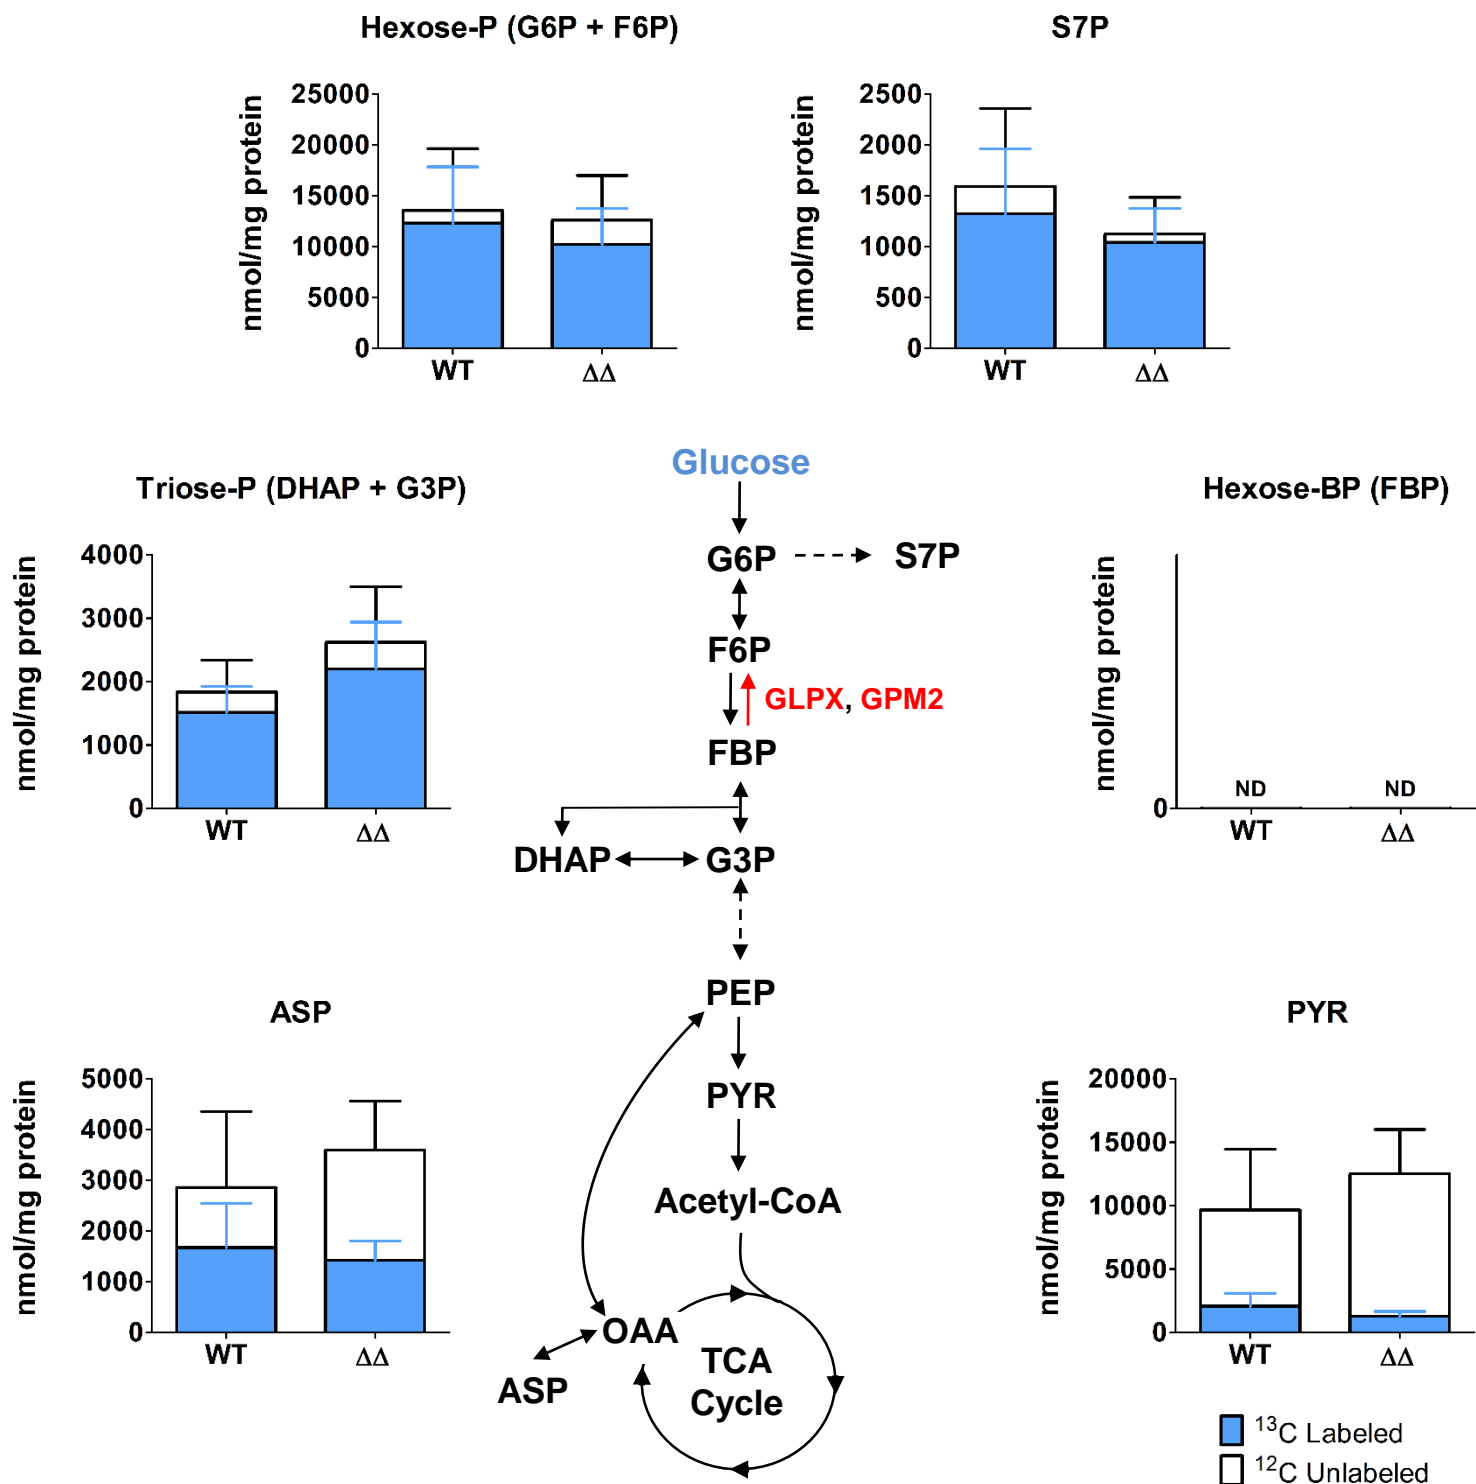

**Supplementary Fig. 7. Glycolysis is unperturbed in *Mtb*  $\Delta glpX\Delta gpm2$ .** Abundance and  $^{13}\text{C}$  labeling of metabolites in WT *Mtb* and  $\Delta glpX\Delta gpm2$  ( $\Delta\Delta$ ). Bacteria were grown on glucose-containing plates for 5 days and then transferred to U- $^{13}\text{C}$  glucose-containing plates for an additional 24h prior to harvesting. Data are means  $\pm$  standard deviation of three biological replicates and are representative of two independent experiments. \* $0.01 < P \leq 0.05$ , \*\* $0.001 < P \leq 0.01$ , \*\*\* $P \leq 0.001$  by Student's t-test. ND indicates that the recovered level of FBP was below the limit of detection ( $3.13 \mu\text{M}$ ). G6P: glucose 6-phosphate, S7P: sedoheptulose 7-phosphate, F6P: fructose 6-phosphate, FBP: fructose 1,6-bisphosphate, DHAP: dihydroxyacetone phosphate, G3P: glyceraldehyde 3-phosphate, PEP: phosphoenolpyruvate, PYR: pyruvate, OAA: oxaloacetate, ASP: aspartate.

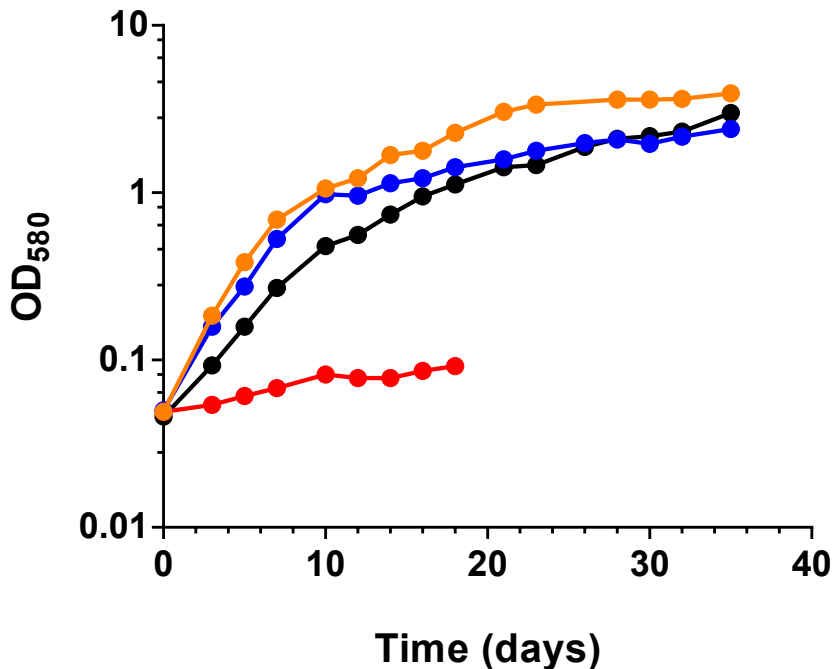

- 0.1% Acetate
- 0.1% Acetate + 0.2% Glucose
- 0.1% Acetate + 0.4% Glucose
- 0.4% Glucose

**Supplementary Fig. 8. Growth of *Mtb*  $\Delta glpX\Delta gpm2$  on glucose is enhanced by the presence of acetate.** Growth of  $\Delta glpX\Delta gpm2$  in Sauton's minimal media containing 0.1% acetate (red), 0.1% acetate and 0.2% glucose (blue) 0.1% acetate and 0.4% glucose (orange) or 0.4% glucose (black) Data are representative of three independent experiments.



**a**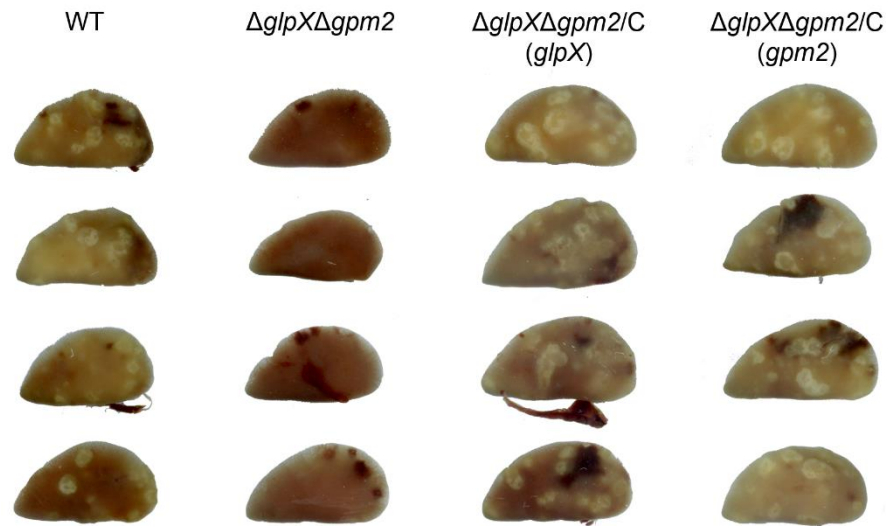**b**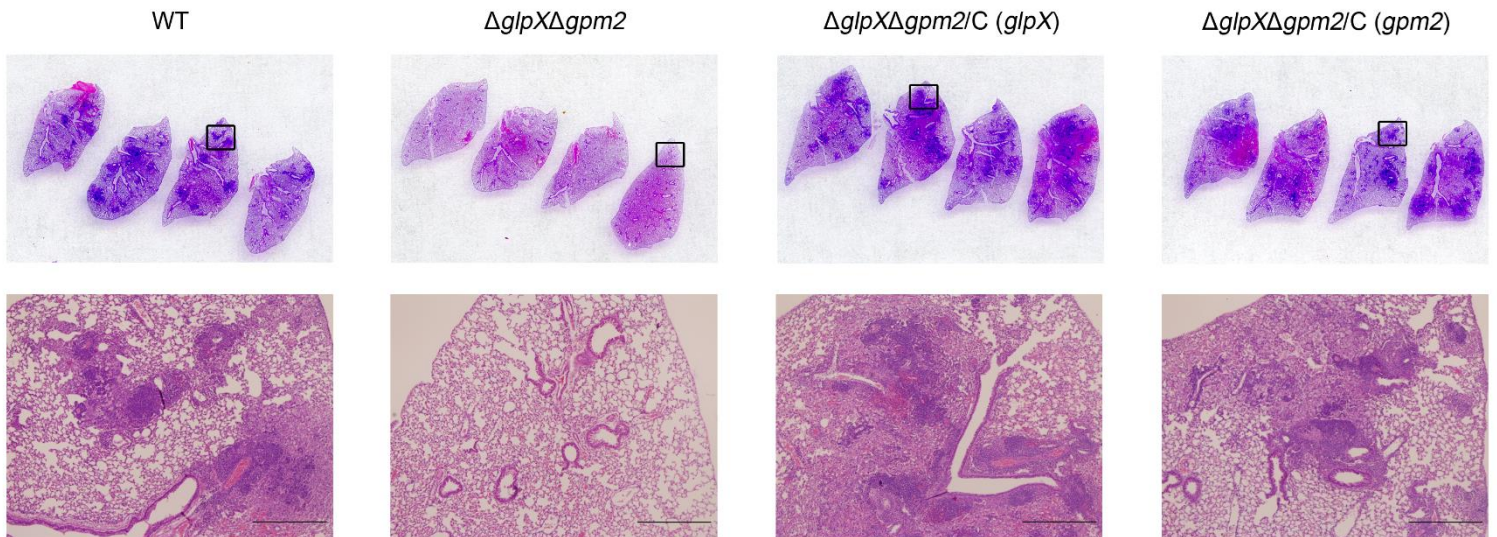

**Supplementary Fig. 9. *Mtb*  $\Delta glpX\Delta gpm2$  is attenuated *in vivo* – Lung histopathology. (a)** Gross pathology of left lung lobes from infected C57BL/6 mice at Day 56 post-infection. **(b)** Hematoxylin and eosin staining of sections from left lung lobes of infected C57BL/6 mice at Day 56 post-infection. Top row of images show sections from four mice per group. Black box indicates region magnified in the bottom row of images. The scale bar is 10  $\mu$ m.

| Purification Step                          | Protein Concentration (mg/mL) | Total Protein (mg) | Activity (nmol/min) | Specific Activity (nmol/min/mg protein x10 <sup>3</sup> ) | Fold Enrichment |
|--------------------------------------------|-------------------------------|--------------------|---------------------|-----------------------------------------------------------|-----------------|
| Total Protein Lysate                       | 1.49                          | 14.91              | 5320                | 0.357                                                     | 1.00            |
| Anion Exchange (Q Sepharose)               | 0.338                         | 1.39               | 1920                | 1.38                                                      | 3.87            |
| Hydrophobic Interaction (Phenyl Sepharose) | 0.0546                        | 0.339              | 1030                | 3.04                                                      | 8.50            |
| Gel Filtration (Superose 6)                | 0.0136                        | 0.00953            | 181                 | 19.0                                                      | 53.27           |
| Anion Exchange (Mono Q)                    | ≤0.0025*                      | ≤0.00125*          | 29.1                | ≥23.3*                                                    | ≥65.13*         |

**Supplementary Table 1. Purification of second FBPase activity from *ΔglpX* cell lysate.** Four purification steps were done in total. Initial FBPase activity and protein concentration for the total lysate sample are shown. After the anion exchange (Q Sepharose), hydrophobic interaction and gel filtration steps, the active fractions were pooled and the FBPase activity and protein concentration of were measured. After the anion exchange (Mono Q) step, the FBPase activity and protein concentration were measured for just the peak activity fraction (Fraction B15). Total protein, specific activity and fold enrichment of activity were determined for each sample accordingly. Asterisks indicate that the protein concentration of the anion exchange (Mono Q) sample was below the limit of detection of the protein measurement assay used (0.0025 mg/mL). As a result, total protein, specific activity and fold enrichment values for this step are presented as minimum values based on the limit of detection of the protein measurement assay.

| Peptide Sequence               | MH <sup>+</sup> (Da) |
|--------------------------------|----------------------|
| HTGGTEVELTDTGR                 | 1472.70              |
| HGETAWSTLGR                    | 1214.59              |
| WVQLPLAEGSR                    | 1255.68              |
| ADSAVALALEHMSSR                | 1573.76              |
| TQAELAGQLLGELELDDPIVICSPR      | 2737.40              |
| QLAVLGLTGHPQPIAAG              | 1642.92              |
| DVLFVSHGHFSR                   | 1400.71              |
| LAGLTVNEVTGLLAEWYDYSYEGLTTPQIR | 3266.67              |

**Supplementary Table 2. GPM2 peptides identified by LC-MS/MS of 25 kDa gel band from Figure 2.**

| Name               | Sequence                                                               | Use in This Study                                |
|--------------------|------------------------------------------------------------------------|--------------------------------------------------|
| JM17               | 5' TATACTTAAGCGGCGTTGCTCTGGGTCAAGCTCAG 3'                              | $\Delta$ glpX Knockout Vector                    |
| JM18               | 5' AATACCTAGGGGCCAGGTTGCGGTCCGGGGCTTCC 3'                              | $\Delta$ glpX Knockout Vector                    |
| JM19               | 5' TATAAAGCTTCACACCCACGACACACAAGGAACCC 3'                              | $\Delta$ glpX Knockout Vector                    |
| JM20               | 5' ATATATGCATGGCGGCCAATGCGTCGTGCAGCTGC 3'                              | $\Delta$ glpX Knockout Vector                    |
| UG1                | 5' ACCACGCACCAATGCTCTAC 3'                                             | $\Delta$ glpX Southern Blot Probe                |
| UG2                | 5' CGGTGGTCAAGACCTGGTTC 3'                                             | $\Delta$ glpX Southern Blot Probe                |
| KO-glpXsm-attB1r   | 5' GGGGACTGCTTTTTTGTACAAACTTGTGCCTCGGTTACCCGGACAAGTTC 3'               | $\Delta$ glpX <sub>Msm</sub> Knockout Vector     |
| KO-glpXsm-attB4    | 5' GGGGACAACCTTTGTATAGAAAAGTTGGTACTCGCTGGTGTCCGAGTTACG 3'              | $\Delta$ glpX <sub>Msm</sub> Knockout Vector     |
| KO-glpXsm-attB2    | 5' GGGGACAGCTTTCTTGTACAAAGTGGACACCAACAAACAAGGGACGCAACAG 3'             | $\Delta$ glpX <sub>Msm</sub> Knockout Vector     |
| KO-glpXsm-attB3    | 5' GGGGACAACCTTTGTATAATAAAGTTGTTGACGAGCACCTCGACGACCTTG 3'              | $\Delta$ glpX <sub>Msm</sub> Knockout Vector     |
| UG3                | 5' TACGAGCTGGGCTTCATCGAC 3'                                            | $\Delta$ glpX <sub>Msm</sub> Southern Blot Probe |
| UG4                | 5'TGGGATACTGGCAGGCATGAC 3'                                             | $\Delta$ glpX <sub>Msm</sub> Southern Blot Probe |
| clo-glpX-attB2     | 5' GGGGACAGCTTTCTTGTACAAAGTGGAAAGGAGGACCAACCATGACAGCTGAGG GATCCGGTT 3' | glpX Complementation Vector                      |
| JM33               | 5' GGGGACAACCTTTGTATAATAAAGTTGCTTAGGGCAATGGGTACACGGCGCTGCT GTCGC 3'    | glpX Complementation Vector                      |
| UG17-SD            | 5' GGGGACAGCTTTCTTGTACAAAGTGGAAAGGAGGTGTCGGTATGGGCGTGCGCA ACCACCG 3'   | gpm2 Complementation Vector                      |
| UG18               | 5' CTTATCGTCATCGTCCTTGTAGTCCCCGGCTGCGATCGGCTGCGGATGACC 3'              | gpm2 Complementation Vector                      |
| OE-gpm2-attB1 (UG) | 5' GGGGACAAGTTTGTACAAAAAAGCAGGCTTGGGCGTGCGCAACCACCGATTGC TAC 3'        | 6xHis-Tagged GPM2                                |
| OE-gpm2-attB2r     | 5' GGGGACCACTTTGTACAAGAAAGCTGGGTTGTGCGCTCACCCGGCTGCGATCG GC 3'         | 6xHis-Tagged GPM2                                |
| KO-gpm2-attB4      | 5' GGGGACAACCTTTGTATAGAAAAGTTGGCGGTCCGGCAGATCGAGCAACACG 3'             | $\Delta$ gpm2 Knockout Vector                    |
| KO-gpm2-attB1r     | 5' GGGGACTGCTTTTTTGTACAAACTTGCCGACAGATTGTGCCCGACGACATC 3'              | $\Delta$ gpm2 Knockout Vector                    |
| KO-gpm2-attB2      | 5' GGGGACAGCTTTCTTGTACAAAGTGGTGGACGCACGGCTGCCAGCTGGAG 3'               | $\Delta$ gpm2 Knockout Vector                    |
| KO-gpm2-attB3      | 5' GGGGACAACCTTTGTATAATAAAGTTGTGAGGTGACGAGATAGCCGTAAGC 3'              | $\Delta$ gpm2 Knockout Vector                    |
| UG20               | 5' AACTGTTGGGCGCGTTGCCTTTC 3'                                          | $\Delta$ gpm2 Southern Blot Probe                |
| UG21               | 5' TTGGCCGAACCTGGCTAGTGC 3'                                            | $\Delta$ gpm2 Southern Blot Probe                |

**Supplementary Table 3. List of primers used in this study.**
